# Supplementary material for: Preparation and Characterization of Antioxidant Peptides from Carrot Seed Protein
Source: Hindawi journal article supplement (doi:10.1155/2018/8579094), 2018-06-19
Supplement: f1 [file 8579094.f1.pdf]

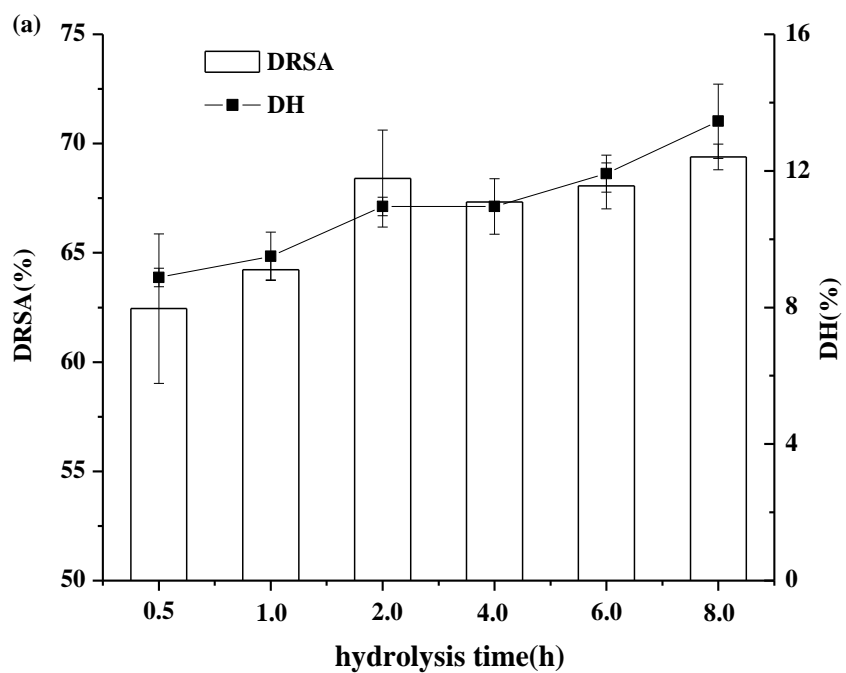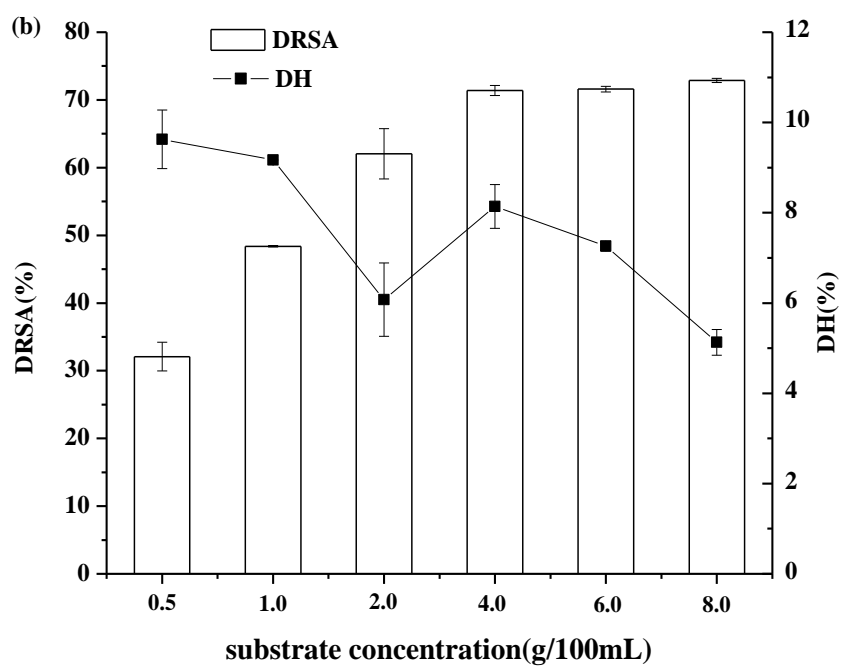

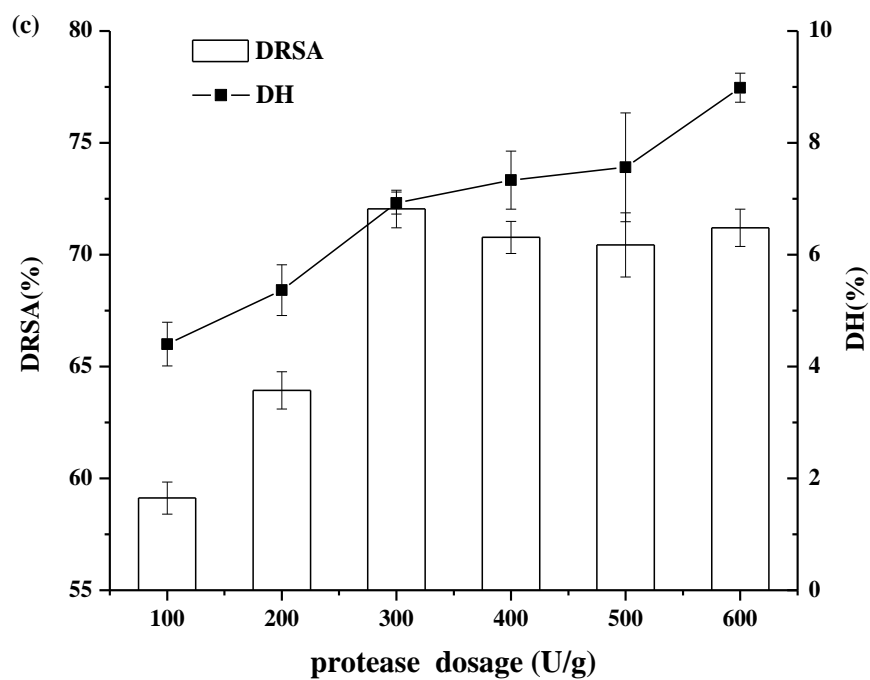

**Figure S1.** Single factor experiment. (a) effect of hydrolysis time on the DRSA and DH; (b) effect of substrate concentration on the DRSA and DH; (c) effect of protease dosage ratio on the DRSA and DH.

Table S1 The hydrolysis conditions for different proteases

| Protease  | temperature<br>( °C ) | pH   | Substrate<br>concentration<br>( % ) | Protease<br>dosage ( U/g ) |
|-----------|-----------------------|------|-------------------------------------|----------------------------|
| alcalase  | 45                    | 10.0 | 2                                   | 4000                       |
| neutrased | 45                    | 7.2  | 2                                   | 4000                       |
| papain    | 55                    | 6.0  | 2                                   | 4000                       |
| trypsin   | 37                    | 7.5  | 2                                   | 4000                       |
